# Supplementary material
Source: PubMed Central journal article supplement (PMC1361621)

## **Supplementary Figures**

### **Supplementary Figure 1**

**Transcription activator activity and localisation.** The percentage of proteins annotated as transcriptional regulators (F-GO term „transcription regulator activity) in different cellular compartments. These sets are: non activators (non) and activators (act) localized only to the nucleus (nucleus), only to the cytoplasm (cytop.) or to both the nucleus and the cytoplasm (N/C).

### **Supplementary Figure 2**

**Additional significant physicochemical properties** of activators and non-activators. KR\_ED represents the net charge of the protein calculated by subtracting the number of negatively charged amino-acids from the number of positively charged amino-acids.

# Titz *et al.* Supplementary Figure 1

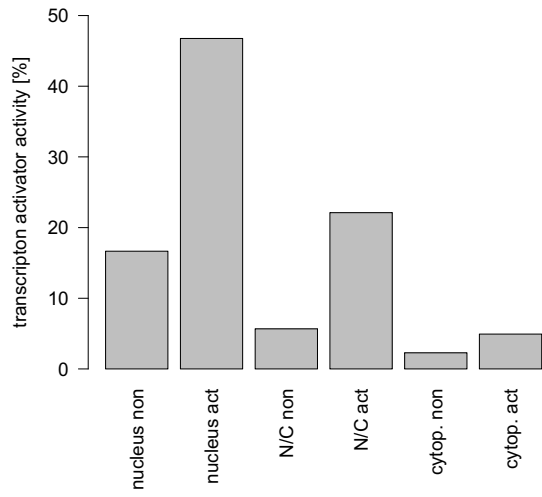

# Titz *et al.* Supplementary Figure 2

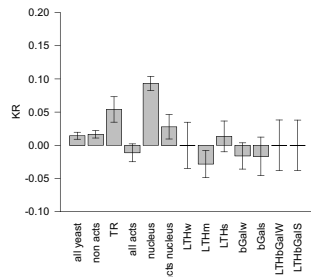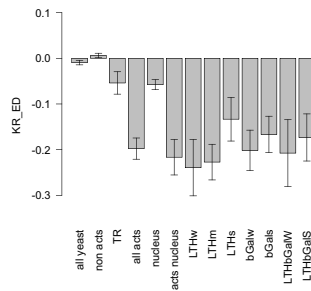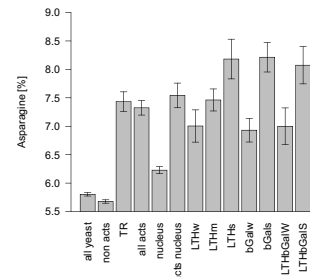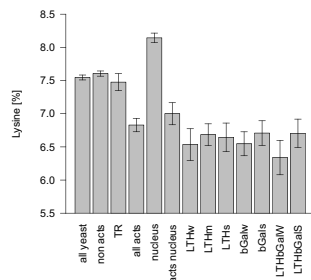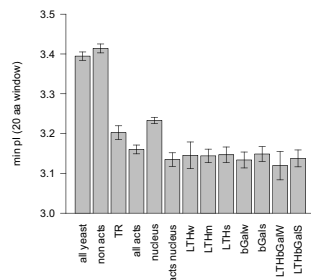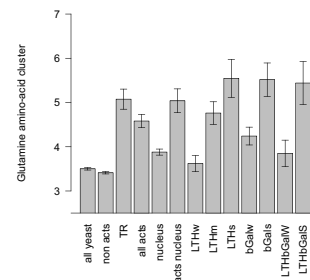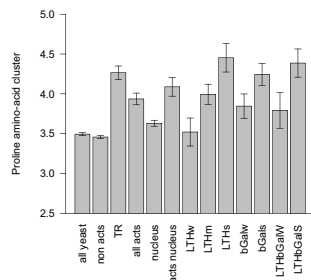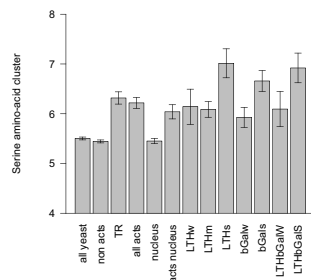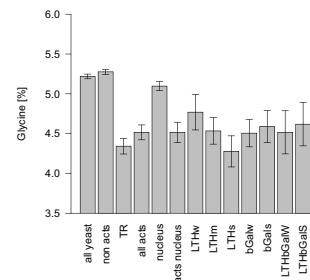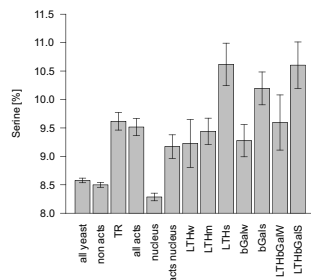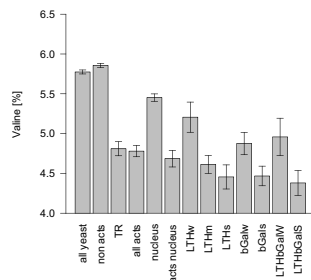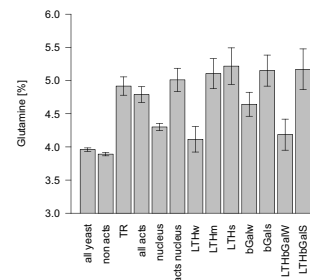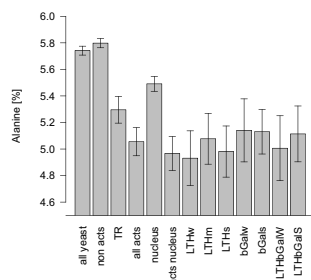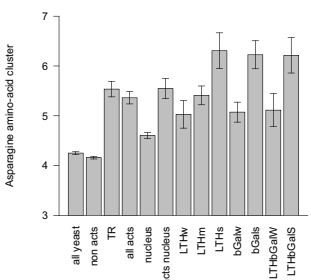

Supplement: nar_34_3_955__1.pdf [file nar_34_3_955__1.pdf]
