# Supplementary material
Source: PubMed Central journal article supplement (PMC1361621)
Supplement: nar_34_3_955__2.pdf [file nar_34_3_955__2.pdf]

## Supplementary Tables

### Supplementary Table 1

All Y2H activators described in this study. The original Y2H study from which they were extracted (Uetz = [24] or Ito = [23]) and the measured activation strengths are given. LTH is the minimal concentration of 3-AT (in mM) that is required to suppress activator activity and thus a direct measure of activation strength. bGAL is the beta-Galactosidase activity measured as described in Materials and Methods, including the Standard Error Mean (SEM) resulting from 3 measurements. Proteins annotated to have the F-GO term “transcriptional activator activity” in the YPD database (Biobase) are indicated (YPD).

| ORF       | name    | source     | LTH (3-AT) | bGAL (+/- SEM)  | YPD |
|-----------|---------|------------|------------|-----------------|-----|
| YAL014C   | YAL014C | Ito        | >200       | 0.8685+/-0.0990 |     |
| YAL040C   | CLN3    | Ito        | 50         | -0.029+/-0.0399 |     |
| YAR003W   | YAR003W | Ito        | 100        | 0.1138+/-0.1060 |     |
| YAR014C   | YAR014C | Ito & Uetz | 50         | NA              |     |
| YAR042W   | SWH1    | Ito        | 25         | -0.073+/-0.0191 |     |
| YAR062W   | YAR062W | Ito        | 50         | 0.2152+/-0.0601 |     |
| YAR074C   |         | Ito        | NA         | NA              |     |
| YBL005W-A |         | Ito        | NA         | NA              |     |
| YBL007C   | SLA1    | Ito        | >200       | 0.8809+/-0.0605 |     |
| YBL010C   | YBL010C | Ito        | 100        | NA              |     |
| YBL025W   | RRN10   | Ito        | NA         | NA              |     |
| YBL032W   |         | Uetz       | NA         | NA              |     |
| YBL046W   | YBL046W | Ito        | 10         | NA              |     |
| YBL049W   | YBL049W | Ito        | NA         | NA              |     |
| YBL051C   | YBL051C | Ito        | 100        | 0.4275+/-0.1067 |     |
| YBL056W   | PTC3    | Ito        | 3          | NA              |     |
| YBL074C   | AAR2    | Ito        | NA         | NA              |     |
| YBL079W   | NUP170  | Ito        | 100        | 0.2055+/-0.0769 |     |
| YBL081W   | YBL081W | Ito        | >200       | 0.8972+/-0.0431 |     |
| YBL093C   | ROX3    | Ito        | >200       | 0.5879+/-0.0490 | y   |
| YBL097W   | BRN1    | Ito        | 10         | NA              |     |
| YBR012C   | YBR012C | Ito        | NA         | NA              |     |
| YBR028C   |         | Uetz       | 10         | NA              |     |
| YBR030W   | YBR030W | Ito        | 100        | 0.5805+/-0.1252 |     |
| YBR045C   | GIP1    | Ito        | NA         | NA              |     |
| YBR050C   | REG2    | Ito & Uetz | NA         | NA              |     |
| YBR057C   | MUM2    | Ito        | NA         | NA              |     |
| YBR058C   | UBP14   | Ito        | 50         | 0.6862+/-0.0742 |     |
| YBR061C   | YBR061C | Ito        | 200        | NA              |     |
| YBR062C   | YBR062C | Ito        | NA         | NA              |     |
| YBR072W   | HSP26   | Ito        | 50         | 0.6162+/-0.1196 |     |

|         |         |            |      |                 |   |
|---------|---------|------------|------|-----------------|---|
| YBR098W | YBR098W | Ito        | 100  | 0.0312+/-0.0478 | y |
| YBR105C | VID24   | Ito        | NA   | NA              |   |
| YBR125C |         | Uetz       | 3    | NA              |   |
| YBR138C | YBR138C | Ito        | 100  | 0.5158+/-0.0970 |   |
| YBR156C |         | Uetz       | NA   | NA              |   |
| YBR193C | MED8    | Ito        | >200 | 0.8372+/-0.1316 | y |
| YBR211C |         | Uetz       | NA   | NA              |   |
| YBR212W | NGR1    | Ito        | 100  | NA              |   |
| YBR239C |         | Uetz       | 3    | NA              |   |
| YBR240C | THI2    | Ito        | 50   | NA              |   |
| YBR250W |         | Uetz       | 3    | NA              |   |
| YBR271W | YBR271W | Ito        | 200  | 0.7195+/-0.1125 |   |
| YBR284W | YBR284W | Ito        | 50   | -0.000+/-0.0249 |   |
| YBR289W | SNF5    | Ito        | 100  | NA              | y |
| YCL012W |         | Ito        | NA   | NA              |   |
| YCL017C | NFS1    | Ito        | 50   | -0.137+/-0.0089 |   |
| YCL032W |         | Uetz       | 3    | NA              |   |
| YCL043C |         | Uetz       | NA   | NA              |   |
| YCR065W | HCM1    | Ito        | 100  | 0.1958+/-0.0279 | y |
| YCR077C | PAT1    | Ito        | >200 | 0.5859+/-0.0760 |   |
| YCR082W | YCR082W | Ito        | 200  | 0.5496+/-0.0552 |   |
| YDL005C | MED2    | Ito        | NA   | NA              |   |
| YDL017W | CDC7    | Ito        | 100  | 0.2612+/-0.0748 |   |
| YDL020C | RPN4    | Ito        | 25   | NA              | y |
| YDL028C |         | Uetz       | 3    | NA              |   |
| YDL037C | YDL037c | Ito        | NA   | NA              |   |
| YDL065C | PEX19   | Ito        | 200  | 0.1532+/-0.0317 |   |
| YDL081C | RPP1A   | Ito        | 200  | 0.1932+/-0.0225 |   |
| YDL088C | ASM4    | Ito        | >200 | 0.0355+/-0.0473 |   |
| YDL106C | GRF10   | Ito        | NA   | NA              |   |
| YDL115C | YDL115c | Ito        | NA   | NA              |   |
| YDL125C |         | Uetz       | NA   | NA              |   |
| YDL130W | RPP1B   | Ito        | 100  | 0.1822+/-0.0318 |   |
| YDL134C | PPH21   | Ito & Uetz | 100  | 0.1252+/-0.0366 |   |
| YDL154W | MSH5    | Ito        | 100  | -0.080+/-0.0233 |   |
| YDL161W | YDL161w | Ito        | >200 | 0.7565+/-0.1249 |   |
| YDL165W | CDC36   | Ito        | 50   | 0.3929+/-0.1141 | y |
| YDL188C | PPH22   | Ito        | 25   | -0.003+/-0.0198 |   |
| YDL215C | GDH2    | Ito        | 3    | NA              |   |
| YDL223C |         | Uetz       | 3    | NA              |   |
| YDR016C | YDR016c | Ito        | 100  | NA              |   |
| YDR022C | CIS1    | Ito        | 100  | 0.0735+/-0.0341 |   |
| YDR031W | YDR031w | Ito        | 200  | 0.4646+/-0.0889 |   |
| YDR045C | YDR045C | Ito        | 10   | 0.0372+/-0.0526 |   |
| YDR073W | SNF11   | Ito        | 100  | 0.3912+/-0.0466 | y |
| YDR075W | YDR075W | Ito & Uetz | NA   | NA              |   |
| YDR081C | PDC2    | Ito        | >200 | 0.0566+/-0.0424 |   |
| YDR082W | STN1    | Ito        | 50   | 0.3036+/-0.0682 |   |

|         |         |      |      |                 |   |
|---------|---------|------|------|-----------------|---|
| YDR098C | YDR098C | Ito  | 3    | 0.0172+/-0.0266 |   |
| YDR103W | STE5    | Ito  | 200  | NA              |   |
| YDR111C |         | Uetz | 3    | NA              |   |
| YDR118W | APC4    | Ito  | >200 | 0.2609+/-0.0465 |   |
| YDR123C | YDR123C | Ito  | NA   | NA              | y |
| YDR124W | YDR124W | Ito  | NA   | NA              |   |
| YDR132C |         | Uetz | 10   | NA              |   |
| YDR145W | YDR145W | Ito  | NA   | NA              | y |
| YDR146C | SWI5    | Ito  | >200 | 0.5196+/-0.1306 | y |
| YDR151C | YDR151C | Ito  | NA   | NA              |   |
| YDR162C | YDR162C | Ito  | NA   | NA              |   |
| YDR164C |         | Uetz | NA   | NA              |   |
| YDR165W |         | Uetz | 3    | NA              |   |
| YDR167W | YDR167W | Ito  | NA   | NA              | y |
| YDR183W | YDR183W | Ito  | NA   | NA              |   |
| YDR184C | ATC1    | Ito  | >200 | 0.5882+/-0.0313 |   |
| YDR189W |         | Uetz | 3    | NA              |   |
| YDR210W | YDR210W | Ito  | 100  | NA              |   |
| YDR213W | YDR213W | Ito  | >200 | 0.5049+/-0.1203 | y |
| YDR216W | ADR1    | Ito  | >200 | 0.4752+/-0.2174 | y |
| YDR221W | YDR221W | Ito  | 3    | NA              |   |
| YDR223W | YDR223W | Ito  | >200 | 0.5482+/-0.0435 |   |
| YDR253C | MET32   | Ito  | 50   | 0.3632+/-0.0988 |   |
| YDR260C | YDR260C | Ito  | 200  | -0.010+/-0.0371 |   |
| YDR273W | YDR273W | Ito  | 100  | 0.5725+/-0.0730 |   |
| YDR277C | MTH1    | Ito  | NA   | NA              |   |
| YDR291W | YDR291W | Ito  | >200 | 0.0675+/-0.0683 |   |
| YDR299W | BFR2    | Ito  | >200 | 0.5766+/-0.0529 |   |
| YDR308C | SRB7    | Ito  | 25   | 0.0699+/-0.0375 |   |
| YDR318W | YDR318W | Ito  | NA   | NA              |   |
| YDR320C | YDR320C | Ito  | >200 | 0.8629+/-0.0902 |   |
| YDR328C | SKP1    | Ito  | 3    | 0.0399+/-0.0280 |   |
| YDR330W | YDR330W | Ito  | 200  | 0.2609+/-0.0773 |   |
| YDR373W |         | Uetz | 3    | NA              |   |
| YDR392W | SPT3    | Ito  | 50   | 0.2372+/-0.1230 | y |
| YDR423C | CAD1    | Ito  | 100  | 0.0096+/-0.0185 | y |
| YDR443C | SSN2    | Ito  | >200 | 0.7916+/-0.0357 |   |
| YDR448W | ADA2    | Ito  | NA   | NA              | y |
| YDR464W | SPP41   | Ito  | 3    | 0.1369+/-0.0537 |   |
| YDR484W |         | Uetz | NA   | NA              |   |
| YDR489W | YDR489W | Ito  | >200 | NA              |   |
| YDR518W |         | Uetz | NA   | NA              |   |
| YDR520C | YDR520C | Ito  | >200 | 0.8299+/-0.0179 |   |
| YDR527W | YDR527W | Ito  | NA   | NA              |   |
| YDR532C | YDR532C | Ito  | 100  | 0.2726+/-0.0802 |   |
| YEL053C | MAK10   | Ito  | 3    | NA              |   |
| YER008C | SEC3    | Ito  | 50   | 0.0352+/-0.0300 |   |
| YER021W | RPN3    | Ito  | 50   | 0.3698+/-0.2191 |   |

|         |         |            |             |                 |   |
|---------|---------|------------|-------------|-----------------|---|
| YER027C | GAL83   | lto        | 100         | 0.0962+/-0.0576 |   |
| YER033C | YER033c | lto        | 100         | NA              |   |
| YER040W | GLN3    | lto        | >200        | NA              |   |
| YER045C | YER045c | lto        | >200        | 0.9192+/-0.0479 | y |
| YER051W |         | Uetz       | 200         | NA              |   |
| YER059W | PCL6    | lto        | 200         | 0.0992+/-0.1759 |   |
| YER089C |         | Uetz       | 3           | NA              |   |
| YER096W | YER096w | lto        | 100         | 0.4195+/-0.0440 |   |
| YER108C |         | lto        | NA          | NA              |   |
| YER111C | SWI4    | lto        | 100         | 0.2982+/-0.1524 | y |
| YER118C | YER118c | lto        | 100         | 0.7692+/-0.0578 |   |
| YER122C |         | Uetz       | 3           | NA              |   |
| YER125W | RSP5    | lto        | >200        | 0.9515+/-0.0602 |   |
| YER130C | YER130c | lto        | 10          | NA              |   |
| YER149C | PEA2    | lto        | 25          | NA              |   |
| YER151C | UBP3    | lto        | >200        | 0.8425+/-0.0947 |   |
| YER167W | BCK2    | lto        | >200        | 0.6002+/-0.2382 |   |
| YFL029C | CAK1    | lto        | 200         | 0.5335+/-0.0385 |   |
| YFL033C | RIM15   | lto        | >200        | 0.4306+/-0.0764 |   |
| YFL049W | YFL049W | lto        | 100         | 0.6852+/-0.1114 |   |
| YFR033C | QCR6    | lto        | 25          | 0.0139+/-0.0445 |   |
| YFR034C | PHO4    | lto        | 200         | 0.5952+/-0.0681 | y |
| YFR043C | YFR043C | lto        | 100         | -0.101+/-0.0157 |   |
| YFR046C | YFR046C | lto        | NA          | NA              |   |
| YGL003C | CDH1    | lto        | 100         | NA              |   |
| YGL015C | YGL015C | lto        | 100         | 0.0675+/-0.0458 |   |
| YGL019W | CKB1    | lto        | 50          | 0.2105+/-0.1388 |   |
| YGL036W | YGL036W | lto        | >200        | 0.5912+/-0.1001 |   |
| YGL043W | DST1    | lto        | 100         | 0.1785+/-0.1442 |   |
| YGL066W | YGL066W | lto & Uetz | 50 (3 Uetz) | 0.7785+/-0.1077 |   |
| YGL070C | RPB9    | lto        | 100         | 0.0272+/-0.0506 |   |
| YGL073W | HSF1    | lto        | >200        | NA              |   |
| YGL079W | YGL079W | lto        | 200         | 0.2138+/-0.0565 |   |
| YGL127C | SOH1    | lto        | 50          | 0.0412+/-0.0288 |   |
| YGL134W | PCL10   | lto        | 25          | -0.054+/-0.0140 |   |
| YGL151W | YGL151W | lto        | NA          | NA              |   |
| YGL154C | LYS5    | lto        | 10          | 0.3445+/-0.1086 |   |
| YGL161C |         | Uetz       | NA          | NA              |   |
| YGL166W | CUP2    | lto        | >200        | 0.8069+/-0.1406 | y |
| YGL170C | YGL170C | lto        | 100         | 0.2252+/-0.1502 |   |
| YGL172W | NUP49   | lto        | 100         | 0.5799+/-0.0877 |   |
| YGL175C | SAE2    | lto        | NA          | NA              |   |
| YGL181W |         | Uetz       | 3           | NA              | y |
| YGL223C | YGL223C | lto        | 200         | NA              |   |
| YGL227W | YGL227W | lto        | NA          | NA              |   |
| YGL229C | SAP4    | lto        | 100         | NA              |   |
| YGR052W |         | Uetz       | 3           | NA              |   |
| YGR070W |         | Uetz       | NA          | NA              |   |

|         |         |      |      |                 |   |
|---------|---------|------|------|-----------------|---|
| YGR077C | PEX8    | Ito  | 25   | 0.0188+/-0.0190 |   |
| YGR120C | YGR120C | Ito  | >200 | NA              |   |
| YGR130C | YGR130C | Ito  | >200 | 0.4559+/-0.0909 |   |
| YGR160W |         | Uetz | 25   | NA              |   |
| YGR163W | YGR163W | Ito  | NA   | NA              |   |
| YGR188C |         | Uetz | 3    | NA              |   |
| YGR241C | YAP1802 | Ito  | >200 | 0.2015+/-0.0863 |   |
| YGR251W | YGR251W | Ito  | 50   | NA              |   |
| YGR253C | PUP2    | Ito  | 200  | 0.1598+/-0.0615 |   |
| YGR256W |         | Uetz | 3    | NA              |   |
| YGR269W | YGR269W | Ito  | 25   | NA              |   |
| YGR274C | YGR274C | Ito  | NA   | NA              | y |
| YGR288W | YGR288W | Ito  | 25   | NA              | y |
| YHL009C | YAP3    | Ito  | NA   | NA              |   |
| YHL012W | YHL012W | Ito  | 200  | NA              |   |
| YHL018W | YHL018W | Ito  | 3    | NA              |   |
| YHR030C | SLT2    | Ito  | 100  | 0.5042+/-0.0686 |   |
| YHR056C | YHR056C | Ito  | 25   | NA              |   |
| YHR086W | NAM8    | Ito  | 3    | NA              |   |
| YHR124W | NDT80   | Ito  | 3    | 0.0272+/-0.0281 |   |
| YHR135C |         | Uetz | 3    | NA              |   |
| YHR149C | YHR149C | Ito  | 10   | NA              |   |
| YHR160C | YHR160C | Ito  | >200 | 1.0002+/-0.0941 |   |
| YHR167W |         | Uetz | 3    | NA              |   |
| YHR170W | NMD3    | Ito  | 3    | NA              |   |
| YHR183W |         | Uetz | 10   | NA              |   |
| YHR184W | SSP1    | Ito  | 25   | NA              |   |
| YHR185C | YHR185C | Ito  | 25   | NA              |   |
| YHR187W | IKI1    | Ito  | 200  | 0.8495+/-0.0858 |   |
| YHR205W | SCH9    | Ito  | 200  | 0.1552+/-0.0475 |   |
| YIL007C |         | Uetz | 50   | NA              |   |
| YIL019W | YIL019W | Ito  | 200  | 0.2692+/-0.0706 |   |
| YIL021W | RPB3    | Ito  | >200 | 0.6482+/-0.0357 |   |
| YIL034C | CAP2    | Ito  | 100  | 0.2682+/-0.0399 |   |
| YIL036W | YIL036W | Ito  | 100  | 0.2162+/-0.0778 | y |
| YIL046W |         | Uetz | NA   | NA              |   |
| YIL062C | ARC15   | Ito  | 100  | -0.047+/-0.0183 |   |
| YIL071W |         | Ito  | NA   | NA              |   |
| YIL079C | YIL079C | Ito  | >200 | 0.9892+/-0.0207 |   |
| YIL093C | YIL093C | Ito  | 3    | -0.042+/-0.0378 |   |
| YIL119C | RPI1    | Ito  | >200 | 0.9349+/-0.0426 | y |
| YIL123W | SIM1    | Ito  | 3    | NA              |   |
| YIL135C | YIL135C | Ito  | 3    | NA              |   |
| YIL151C | YIL151C | Ito  | NA   | NA              |   |
| YIR010W | YIR010W | Ito  | 100  | 0.0122+/-0.0233 |   |
| YIR025W | YIR025W | Ito  | 3    | -0.092+/-0.0238 |   |
| YJL029C | YJL029C | Ito  | >200 | NA              |   |
| YJL058C | YJL058C | Ito  | 50   | 0.0046+/-0.0229 |   |

|         |         |            |              |                 |   |
|---------|---------|------------|--------------|-----------------|---|
| YJL069C | YJL069C | Ito        | 100          | -0.019+/-0.0421 |   |
| YJL070C | YJL070C | Ito        | NA           | NA              |   |
| YJL084C | YJL084C | Ito        | 50           | NA              |   |
| YJL098W | YJL098W | Ito        | 10           | NA              |   |
| YJL100W |         | Uetz       | 100          | NA              |   |
| YJL103C | YJL103C | Ito        | 50           | -0.056+/-0.0198 |   |
| YJL106W | IME2    | Ito        | 10           | NA              |   |
| YJL116C | NCA3    | Ito        | 200          | 0.6629+/-0.1065 |   |
| YJL126W |         | Uetz       | 3            | NA              |   |
| YJL127C | SPT10   | Ito        | 25           | -0.076+/-0.0166 | y |
| YJL146W | IDS2    | Ito        | >200         | 0.2022+/-0.1395 |   |
| YJL147C | YJL147C | Ito        | 3            | NA              |   |
| YJL159W | HSP150  | Ito        | NA           | NA              |   |
| YJL176C | SWI3    | Ito        | 200          | 0.0189+/-0.0175 |   |
| YJL181W | YJL181W | Ito        | >200         | 0.1689+/-0.0668 |   |
| YJL185C | YJL185C | Ito        | 50           | 0.0228+/-0.0163 |   |
| YJL187C | SWE1    | Ito        | 25           | 0.0969+/-0.0519 |   |
| YJL204C |         | Uetz       | 3            | NA              |   |
| YJL218W | YJL218W | Ito        | 100          | NA              |   |
| YJR002W | MPP10   | Ito        | 25           | -0.006+/-0.0353 |   |
| YJR042W | YJR042W | Ito        | NA           | NA              |   |
| YJR056C |         | Uetz       | 3            | NA              |   |
| YJR063W | RPA12   | Ito        | 200          | -0.011+/-0.0032 |   |
| YJR067C | YAE1    | Ito        | 3            | NA              |   |
| YJR070C | YJR070C | Ito & Uetz | 200 (3 Uetz) | NA              |   |
| YJR082C | YJR082C | Ito        | 3            | 0.0038+/-0.0197 |   |
| YJR093C | FIP1    | Ito        | 100          | -0.134+/-0.0214 |   |
| YJR094C | IME1    | Ito        | 200          | NA              |   |
| YJR112W | NNF1    | Ito        | 10           | NA              |   |
| YJR119C | YJR119C | Ito        | 200          | 0.2019+/-0.1009 |   |
| YJR125C | YJR125C | Ito        | 3            | NA              |   |
| YJR141W |         | Uetz       | 10           | NA              |   |
| YKL002W | YKL002W | Ito        | 100          | NA              |   |
| YKL015W | PUT3    | Ito        | 200          | 0.3072+/-0.0846 | y |
| YKL025C | PAN3    | Ito        | 100          | 0.2319+/-0.0485 |   |
| YKL028W | TFA1    | Ito        | 100          | 0.3572+/-0.1658 |   |
| YKL038W | YKL038W | Ito        | NA           | NA              | y |
| YKL048C |         | Uetz       | 10           | NA              |   |
| YKL059C | YKL059C | Ito        | 200          | 0.1292+/-0.0985 |   |
| YKL061W | YKL061W | Ito        | 100          | 0.3545+/-0.1920 |   |
| YKL062W | MSN4    | Ito        | 100          | 0.7522+/-0.0354 | y |
| YKL068W | NUP100  | Ito        | 200          | 0.3679+/-0.0517 |   |
| YKL093W | MBR1    | Ito        | 200          | -0.132+/-0.0142 |   |
| YKL109W | HAP4    | Ito        | 200          | 0.6056+/-0.0597 | y |
| YKL135C | APL2    | Ito        | >200         | 0.1112+/-0.0662 |   |
| YKL143W | LTV1    | Ito        | 200          | 0.5272+/-0.0376 |   |
| YKL161C | YKL161C | Ito        | 3            | 0.0465+/-0.0765 |   |
| YKL165C | MCD4    | Ito        | >200         | 0.3156+/-0.0892 |   |

|         |         |      |      |                 |   |
|---------|---------|------|------|-----------------|---|
| YKL171W | YKL171W | Ito  | 200  | NA              |   |
| YKL173W | SNU114  | Ito  | 100  | 0.1232+/-0.0124 |   |
| YKL190W |         | Uetz | 25   | NA              |   |
| YKR017C | YKR017C | Ito  | 50   | 0.0619+/-0.0165 |   |
| YKR021W | YKR021W | Ito  | 50   | 0.3116+/-0.0905 |   |
| YKR022C |         | Uetz | 100  | NA              |   |
| YKR027W | YKR027W | Ito  | 50   | 0.2616+/-0.0432 |   |
| YKR048C | NAP1    | Ito  | 200  | 0.6022+/-0.0544 |   |
| YKR060W | YKR060W | Ito  | >200 | NA              |   |
| YKR064W | YKR064W | Ito  | 200  | -0.024+/-0.0423 |   |
| YKR077W | YKR077W | Ito  | >200 | 0.9899+/-0.0390 |   |
| YLL013C | YLL013C | Ito  | >200 | 0.7076+/-0.0934 |   |
| YLR016C |         | Uetz | 50   | NA              |   |
| YLR019W | YLR019W | Ito  | 100  | NA              |   |
| YLR024C | YLR024C | Ito  | 100  | 0.1615+/-0.0752 |   |
| YLR038C | COX12   | Ito  | 3    | NA              |   |
| YLR053C | YLR053C | Ito  | 3    | NA              |   |
| YLR071C | RGR1    | Ito  | 50   | NA              | y |
| YLR085C | ARP6    | Ito  | 25   | NA              |   |
| YLR095C | YLR095C | Ito  | 100  | 0.2445+/-0.0776 |   |
| YLR098C | CHA4    | Ito  | 200  | 0.6499+/-0.0856 | y |
| YLR102C | APC9    | Ito  | 100  | NA              |   |
| YLR113W | HOG1    | Ito  | 100  | 0.1389+/-0.0362 |   |
| YLR119W | SRN2    | Ito  | 3    | NA              |   |
| YLR131C | ACE2    | Ito  | >200 | NA              | y |
| YLR135W | YLR135W | Ito  | >200 | 0.7172+/-0.1206 |   |
| YLR144C | ACF2    | Ito  | >200 | NA              |   |
| YLR154C | YLR154C | Ito  | 3    | -0.099+/-0.0144 |   |
| YLR182W | SWI6    | Ito  | 100  | NA              | y |
| YLR192C | YLR192C | Ito  | >200 | 0.8849+/-0.0641 |   |
| YLR212C | TUB4    | Ito  | 100  | 0.2939+/-0.0491 |   |
| YLR215C |         | Uetz | 100  | NA              |   |
| YLR226W |         | Uetz | NA   | NA              |   |
| YLR228C | ECM22   | Ito  | >200 | 0.7762+/-0.1344 | y |
| YLR273C | PIG1    | Ito  | 100  | NA              |   |
| YLR285W | YLR285W | Ito  | >200 | 0.9469+/-0.0781 |   |
| YLR288C | MEC3    | Ito  | 25   | NA              |   |
| YLR300W | EXG1    | Ito  | 25   | NA              |   |
| YLR321C | SFH1    | Ito  | 100  | 0.2722+/-0.0064 |   |
| YLR331C | YLR331C | Ito  | 100  | 1.0302+/-0.0364 |   |
| YLR371W |         | Uetz | 3    | NA              |   |
| YLR403W | SFP1    | Ito  | 3    | 0.0022+/-0.0089 |   |
| YLR417W | VPS36   | Ito  | 25   | 0.0082+/-0.0187 |   |
| YLR424W | YLR424W | Ito  | 100  | -0.011+/-0.0300 |   |
| YLR435W | YLR435W | Ito  | 10   | -0.028+/-0.0141 |   |
| YLR445W | YLR445W | Ito  | 200  | 0.1456+/-0.0112 |   |
| YLR451W | LEU3    | Ito  | 100  | 0.3956+/-0.1238 | y |
| YML037C | YML037C | Ito  | 200  | 0.0382+/-0.0207 |   |

|         |         |      |      |                 |   |
|---------|---------|------|------|-----------------|---|
| YML058W | SML1    | Ito  | 3    | NA              |   |
| YML068W | YML068W | Ito  | 3    | -0.098+/-0.0059 |   |
| YML081W | YML081W | Ito  | 3    | -0.061+/-0.0332 |   |
| YML091C | YML091C | Ito  | NA   | NA              |   |
| YML099C | ARG81   | Ito  | 100  | NA              | y |
| YML128C | YML128C | Ito  | 100  | 0.3646+/-0.0531 |   |
| YMR004W | MVP1    | Ito  | >200 | 0.3639+/-0.0600 |   |
| YMR022W |         | Uetz | 3    | NA              |   |
| YMR030W | YMR030W | Ito  | >200 | 0.0425+/-0.0698 | y |
| YMR037C | MSN2    | Ito  | >200 | 1.1689+/-0.1381 | y |
| YMR048W | YMR048W | Ito  | >200 | 0.1739+/-0.0609 |   |
| YMR080C | NAM7    | Ito  | 200  | 0.0282+/-0.0298 |   |
| YMR081C | ISF1    | Ito  | 200  | 0.2389+/-0.0471 |   |
| YMR091C | NPL6    | Ito  | 25   | NA              |   |
| YMR112C | YMR112C | Ito  | 100  | 0.2012+/-0.0585 |   |
| YMR133W | REC114  | Ito  | 200  | -0.035+/-0.0319 |   |
| YMR179W | SPT21   | Ito  | >200 | -0.009+/-0.0390 |   |
| YMR181C | YMR181C | Ito  | >200 | 0.8592+/-0.0775 |   |
| YMR195W | YMR195W | Ito  | >200 | 0.3746+/-0.0845 |   |
| YMR223W | UBP8    | Ito  | 50   | 0.6462+/-0.1722 |   |
| YMR227C | YMR227C | Ito  | NA   | NA              |   |
| YMR236W | YMR236W | Ito  | NA   | NA              | y |
| YMR270C | RRN9    | Ito  | 100  | NA              |   |
| YMR277W | FCP1    | Ito  | 200  | 0.1342+/-0.0405 |   |
| YMR295C | YMR295C | Ito  | >200 | NA              |   |
| YMR297W | PRC1    | Ito  | 25   | NA              |   |
| YMR299C | YMR299C | Ito  | 200  | 0.0979+/-0.0148 |   |
| YMR323W | YMR323W | Ito  | 3    | -0.014+/-0.0122 |   |
| YNL004W | HRB1    | Ito  | 3    | -0.062+/-0.0235 |   |
| YNL025C | SSN8    | Ito  | 100  | 0.2122+/-0.0517 |   |
| YNL027W | CRZ1    | Ito  | >200 | 0.8595+/-0.0728 |   |
| YNL032W | SIW14   | Ito  | 200  | 0.7252+/-0.1191 |   |
| YNL074C | YNL074C | Ito  | NA   | NA              |   |
| YNL075W |         | Uetz | 25   | NA              |   |
| YNL091W | YNL091W | Ito  | 50   | -0.014+/-0.0416 |   |
| YNL092W | YNL092W | Ito  | 3    | -0.045+/-0.0169 |   |
| YNL103W | MET4    | Ito  | >200 | 0.7636+/-0.0770 | y |
| YNL127W | YNL127W | Ito  | 3    | 0.0485+/-0.0240 |   |
| YNL151C | RPC31   | Ito  | 50   | -0.026+/-0.0369 |   |
| YNL161W | CBK1    | Ito  | 100  | 0.3809+/-0.1267 |   |
| YNL164C | YNL164C | Ito  | 3    | 0.0162+/-0.0497 |   |
| YNL192W | YNL192W | Ito  | NA   | NA              |   |
| YNL199C | GCR2    | Ito  | 100  | 0.5216+/-0.0662 | y |
| YNL204C | SPS18   | Ito  | 100  | 0.0242+/-0.0378 |   |
| YNL223W | YNL223W | Ito  | NA   | NA              |   |
| YNL225C | CNM67   | Ito  | 100  | 0.1709+/-0.0875 |   |
| YNL236W | SIN4    | Ito  | >200 | 0.1229+/-0.0694 |   |
| YNL245C |         | Uetz | NA   | NA              |   |



|         |         |            |      |                 |   |
|---------|---------|------------|------|-----------------|---|
| YNL308C |         | Uetz       | 3    | NA              |   |
| YNL309W | STB1    | Ito        | 100  | NA              | y |
| YNL314W | DAL82   | Ito        | 100  | -0.047+/-0.0655 | y |
| YNL330C | RPD3    | Ito        | 10   | NA              |   |
| YNR003C | RPC34   | Ito        | 3    | NA              |   |
| YNR004W | YNR004W | Ito        | 10   | 0.0165+/-0.0629 |   |
| YNR010W | CSE2    | Ito        | 200  | 0.3445+/-0.0819 |   |
| YNR017W | MAS6    | Ito        | 200  | 0.5209+/-0.1233 |   |
| YNR023W | SNF12   | Ito        | NA   | NA              |   |
| YNR032W | PPG1    | Ito        | 200  | NA              |   |
| YNR063W | YNR063W | Ito        | 100  | 0.0312+/-0.0368 |   |
| YNR069C | YNR069C | Ito        | >200 | 0.9416+/-0.3435 |   |
| YOL044W |         | Uetz       | 3    | NA              |   |
| YOL051W | GAL11   | Ito        | 200  | 0.9772+/-0.0244 | y |
| YOL067C | RTG1    | Ito        | >200 | 0.5925+/-0.0651 | y |
| YOL082W | YOL082W | Ito        | NA   | NA              |   |
| YOL083W | YOL083W | Ito        | NA   | NA              |   |
| YOL108C | INO4    | Ito        | 100  | NA              | y |
| YOL112W | MSB4    | Ito        | 200  | 0.4759+/-0.1309 |   |
| YOL135C | MED7    | Ito        | 50   | 0.0815+/-0.0151 |   |
| YOL136C | PFK27   | Ito        | 200  | 0.3526+/-0.0579 |   |
| YOL148C | SPT20   | Ito        | 100  | 0.4402+/-0.1069 | y |
| YOR032C | HMS1    | Ito        | NA   | NA              |   |
| YOR066W | YOR066W | Ito        | >200 | 0.5309+/-0.1226 |   |
| YOR069W |         | Uetz       | NA   | NA              |   |
| YOR070C | GYP1    | Ito        | >200 | -0.070+/-0.0176 |   |
| YOR113W |         | Uetz       | NA   | NA              | y |
| YOR128C | ADE2    | Ito        | NA   | NA              |   |
| YOR151C | YOR151C | Ito & Uetz | NA   | NA              |   |
| YOR162C | YRR1    | Ito        | 100  | 0.0812+/-0.0411 | y |
| YOR166C | YOR166C | Ito        | 200  | 0.0519+/-0.0395 |   |
| YOR174W | MED4    | Ito        | >200 | 0.1035+/-0.0747 |   |
| YOR177C |         | Uetz       | 3    | NA              |   |
| YOR178C | GAC1    | Ito        | >200 | 0.5292+/-0.0982 |   |
| YOR194C | TOA1    | Ito        | >200 | NA              |   |
| YOR197W | YOR197W | Ito        | 100  | 0.1565+/-0.0919 |   |
| YOR212W | STE4    | Ito        | NA   | NA              |   |
| YOR262W | YOR262W | Ito        | 200  | 0.5596+/-0.0335 |   |
| YOR281C | YOR281C | Ito        | 100  | NA              |   |
| YOR290C | SNF2    | Ito        | 200  | 0.7139+/-0.1587 |   |
| YOR299W | BUD7    | Ito        | 50   | 0.1079+/-0.0420 |   |
| YOR329C | SCD5    | Ito        | >200 | 0.2706+/-0.0516 |   |
| YOR339C |         | Uetz       | NA   | NA              |   |
| YOR344C | TYE7    | Ito        | 100  | 0.3559+/-0.1249 | y |
| YOR352W | YOR352W | Ito        | 100  | 0.2375+/-0.0558 |   |
| YOR355W | GDS1    | Ito        | 100  | 0.2076+/-0.0304 |   |
| YOR370C | MRS6    | Ito        | >200 | 0.5295+/-0.1343 |   |
| YOR382W | YOR382W | Ito        | 3    | -0.023+/-0.0297 |   |

|         |         |            |      |                 |   |
|---------|---------|------------|------|-----------------|---|
| YPL011C | YPL011C | Ito        | NA   | NA              |   |
| YPL014W | YPL014W | Ito        | 3    | 0.0819+/-0.0381 |   |
| YPL026C | SKS1    | Ito        | 50   | -0.025+/-0.0102 |   |
| YPL038W | MET31   | Ito        | 50   | 0.0242+/-0.0316 |   |
| YPL042C | SSN3    | Ito        | NA   | NA              |   |
| YPL054W | LEE1    | Ito        | 50   | -0.041+/-0.0251 |   |
| YPL055C | YPL055C | Ito        | 3    | -0.047+/-0.0301 |   |
| YPL075W | GCR1    | Ito        | 50   | 0.0769+/-0.0356 | y |
| YPL089C | RLM1    | Ito        | 200  | NA              |   |
| YPL105C | YPL105C | Ito        | 200  | 0.0619+/-0.0482 |   |
| YPL124W | YPL124W | Ito        | NA   | NA              |   |
| YPL174C | NIP100  | Ito        | 100  | -0.056+/-0.0151 |   |
| YPL184C | YPL184C | Ito        | 100  | 0.5069+/-0.1525 |   |
| YPL202C | YPL202C | Ito        | NA   | NA              | y |
| YPL229W | YPL229W | Ito & Uetz | 200  | 0.0929+/-0.0316 |   |
| YPL233W | YPL233W | Ito        | 200  | NA              |   |
| YPL250C | YPL250C | Ito        | >200 | 0.5319+/-0.1199 |   |
| YPL254W | HFI1    | Ito        | 100  | 0.2372+/-0.1030 | y |
| YPL256C | CLN2    | Ito        | NA   | NA              |   |
| YPL278C | YPL278C | Ito        | 100  | 0.3419+/-0.0477 |   |
| YPR007C | YPR007C | Ito        | 3    | -0.013+/-0.0290 |   |
| YPR008W | YPR008W | Ito        | >200 | 0.8622+/-0.1090 |   |
| YPR040W |         | Uetz       | 3    | NA              |   |
| YPR046W | MCM16   | Ito        | 50   | 0.0815+/-0.0187 |   |
| YPR066W | YPR066W | Ito        | NA   | NA              |   |
| YPR070W | YPR070W | Ito        | NA   | NA              |   |
| YPR076W | YPR076W | Ito        | 100  | 0.4306+/-0.0696 |   |
| YPR103W | PRE2    | Ito        | 100  | 0.0619+/-0.0151 |   |
| YPR105C |         | Uetz       | 3    | NA              |   |
| YPR119W |         | Uetz       | 3    | NA              |   |
| YPR144C | YPR144C | Ito & Uetz | 50   | NA              |   |
| YPR168W | NUT2    | Ito        | 100  | 0.0442+/-0.0305 |   |
| YPR179C | YPR179C | Ito        | >200 | 0.8885+/-0.0251 |   |
| YPR180W | AOS1    | Ito        | >200 | -0.048+/-0.1139 |   |
| YPR187W | RPO26   | Ito        | 100  | 0.0695+/-0.0532 |   |
| YPR192W | YPR192W | Ito        | NA   | NA              |   |

## Supplementary Table 2

**Influence of „specific“ physicochemical properties onto activation properties.** The mean difference of several „specific“ physicochemical properties in the nuclear sets of activators and non-activators evaluated. The table shows the analyzed properties, together with their raw p-value of a Student's t-test and the p-values after correction for multiple testing (Bonferroni correction and Holm's correction). Significance after Holm's correction at a level of  $p < 0.05$  is indicated. Significant groups are labelled yellow.

|                                                                                                              |                       | raw p-value | Bonferroni correction | Holm's correction |
|--------------------------------------------------------------------------------------------------------------|-----------------------|-------------|-----------------------|-------------------|
| Over-/underrepresentation of amino-acid groups indicated by one letter code (calculated using SAPS programm) | KR                    | 6.98E-04    | 3.28E-02              | 2.65E-02          |
|                                                                                                              | O                     | 6.09E-01    | 1.00E+00              | 1.00E+00          |
|                                                                                                              | KR_ED                 | 1.12E-05    | 5.27E-04              | 4.71E-04          |
|                                                                                                              | LVIFM                 | 1.37E-01    | 1.00E+00              | 1.00E+00          |
|                                                                                                              | ST                    | 8.32E-02    | 1.00E+00              | 1.00E+00          |
|                                                                                                              | AGP                   | 5.70E-01    | 1.00E+00              | 1.00E+00          |
|                                                                                                              | FIKMNY                | 5.14E-01    | 1.00E+00              | 1.00E+00          |
|                                                                                                              | ED                    | 9.17E-02    | 1.00E+00              | 1.00E+00          |
| segments or clusters of physicochemical properties (charge, hydrophobicity) (calculated with SAPS program)   | KRED                  | 6.09E-01    | 1.00E+00              | 1.00E+00          |
|                                                                                                              | positive cluster      | 8.18E-02    | 1.00E+00              | 1.00E+00          |
|                                                                                                              | negative cluster      | 1.64E-02    | 7.73E-01              | 5.26E-01          |
|                                                                                                              | hydrophobic segment   | 2.63E-01    | 1.00E+00              | 1.00E+00          |
| clusters of amino-acids indicated by one letter code (calculated with SAPS program)                          | transmembrane segment | 6.40E-01    | 1.00E+00              | 1.00E+00          |
|                                                                                                              | AAClusterQ            | 2.03E-03    | 9.56E-02              | 7.52E-02          |
|                                                                                                              | AAClusterN            | 3.37E-01    | 1.00E+00              | 1.00E+00          |
|                                                                                                              | AAClusterH            | 6.06E-05    | 2.85E-03              | 2.36E-03          |
|                                                                                                              | AAClusterY            | 8.94E-01    | 1.00E+00              | 1.00E+00          |
|                                                                                                              | AAClusterP            | 2.36E-01    | 1.00E+00              | 1.00E+00          |
|                                                                                                              | AAClusterW            | 4.61E-01    | 1.00E+00              | 1.00E+00          |
|                                                                                                              | AAClusterF            | 3.19E-01    | 1.00E+00              | 1.00E+00          |
| Over-/underrepresentation of specific amino-acids indicated by one letter code                               | AAClusterS            | 4.64E-03    | 2.18E-01              | 1.62E-01          |
|                                                                                                              | AAClusterT            | 8.33E-02    | 1.00E+00              | 1.00E+00          |
|                                                                                                              | L                     | 7.77E-01    | 1.00E+00              | 1.00E+00          |
|                                                                                                              | A                     | 3.02E-05    | 1.42E-03              | 1.21E-03          |
|                                                                                                              | G                     | 4.60E-06    | 2.16E-04              | 2.02E-04          |
|                                                                                                              | S                     | 5.74E-06    | 2.70E-04              | 2.47E-04          |
|                                                                                                              | V                     | 5.06E-13    | 2.38E-11              | 2.38E-11          |
|                                                                                                              | K                     | 9.55E-12    | 4.49E-10              | 4.39E-10          |
|                                                                                                              | E                     | 2.95E-01    | 1.00E+00              | 1.00E+00          |
|                                                                                                              | T                     | 6.45E-01    | 1.00E+00              | 1.00E+00          |
|                                                                                                              | D                     | 4.43E-03    | 2.08E-01              | 1.59E-01          |
|                                                                                                              | I                     | 1.31E-01    | 1.00E+00              | 1.00E+00          |
|                                                                                                              | R                     | 7.70E-02    | 1.00E+00              | 1.00E+00          |
|                                                                                                              | P                     | 7.51E-03    | 3.53E-01              | 2.48E-01          |
|                                                                                                              | N                     | 2.46E-10    | 1.16E-08              | 1.11E-08          |
|                                                                                                              | R                     | 4.46E-01    | 1.00E+00              | 1.00E+00          |
| Q                                                                                                            | 1.55E-05              | 7.29E-04    | 6.36E-04              |                   |
| Y                                                                                                            | 3.28E-01              | 1.00E+00    | 1.00E+00              |                   |
| H                                                                                                            | 9.15E-02              | 1.00E+00    | 1.00E+00              |                   |
| M                                                                                                            | 6.56E-02              | 1.00E+00    | 1.00E+00              |                   |
| C                                                                                                            | 6.55E-01              | 1.00E+00    | 1.00E+00              |                   |
| W                                                                                                            | 7.06E-03              | 3.32E-01    | 2.40E-01              |                   |

### Supplementary Table 3

**Functional groups among Y2H activators.** GO terms in the set of Y2H activators were compared to the whole yeast genome using the program FuncAssociate [32]. GO terms are ranked according to the significance of their overrepresentation in this dataset.

See <http://llama.med.harvard.edu/cgi/func/funcassociate> for technical details.

|       |                                                                                                                                          |
|-------|------------------------------------------------------------------------------------------------------------------------------------------|
| Rank  | position in the attribute list ranked by significance of association                                                                     |
| N     | number of genes in your query with this attribute;                                                                                       |
| X     | number of genes overall with this attribute;                                                                                             |
| LOD   | the natural log of the odds ratio; positive and negative values indicate over- and underrepresentation, respectively;                    |
| P     | single hypothesis one-sided P-value of the association between attribute and query (based on Fisher's Exact Test);                       |
| P-adj | adjusted P-value: fraction (as a %) of 1000 null-hypothesis simulations having attributes with this single-hypothesis P value or smaller |

| Rank | N   | X    | LOD   | P       | P-adj  | GO Attribute                                                                      |
|------|-----|------|-------|---------|--------|-----------------------------------------------------------------------------------|
| 1    | 92  | 319  | 0.816 | 5.7e-35 | <0.001 | <a href="#">0030528</a> : transcription regulator activity                        |
| 2    | 105 | 461  | 0.684 | 3.4e-30 | <0.001 | <a href="#">0006350</a> : transcription                                           |
| 3    | 95  | 429  | 0.657 | 3.5e-26 | <0.001 | <a href="#">0006351</a> : transcription, DNA-dependent                            |
| 4    | 72  | 265  | 0.759 | 1.9e-25 | <0.001 | <a href="#">0006366</a> : transcription from Pol II promoter                      |
| 5    | 47  | 123  | 0.959 | 8.9e-24 | <0.001 | <a href="#">0003702</a> : RNA polymerase II transcription factor activity         |
| 6    | 233 | 1940 | 0.430 | 1.9e-23 | <0.001 | <a href="#">0005634</a> : nucleus                                                 |
| 7    | 83  | 426  | 0.573 | 5.4e-19 | <0.001 | <a href="#">0050789</a> : regulation of biological process/regulation             |
| 8    | 29  | 62   | 1.095 | 6e-18   | <0.001 | <a href="#">0016251</a> : general RNA polymerase II transcription factor activity |
| 9    | 87  | 516  | 0.494 | 9.3e-16 | <0.001 | <a href="#">0007049</a> : cell cycle/cell-division cycle                          |
| 10   | 60  | 283  | 0.602 | 1.4e-15 | <0.001 | <a href="#">0005654</a> : nucleoplasm                                             |
| 11   | 70  | 376  | 0.536 | 5.8e-15 | <0.001 | <a href="#">0050791</a> : regulation of physiological process                     |
| 12   | 70  | 376  | 0.536 | 5.8e-15 | <0.001 | <a href="#">0019222</a> : regulation of metabolism                                |
| 13   | 91  | 588  | 0.449 | 4.2e-14 | <0.001 | <a href="#">0008283</a> : cell proliferation                                      |
| 14   | 27  | 74   | 0.910 | 1.6e-13 | <0.001 | <a href="#">0016591</a> : DNA-directed RNA polymerase II, holoenzyme              |
| 15   | 45  | 206  | 0.608 | 2.2e-12 | <0.001 | <a href="#">0000278</a> : mitotic cell cycle                                      |
| 16   | 166 | 1492 | 0.314 | 6.6e-12 | <0.001 | <a href="#">0006139</a> : nucleobase, nucleoside, nucleotide and nucleic acid     |

|    |     |      |       |         |        |                                                                                                                 |
|----|-----|------|-------|---------|--------|-----------------------------------------------------------------------------------------------------------------|
|    |     |      |       |         |        | metabolism                                                                                                      |
| 17 | 55  | 297  | 0.522 | 8.3e-12 | <0.001 | <a href="#">0006355</a> : regulation of transcription, DNA-dependent                                            |
| 18 | 56  | 306  | 0.516 | 8.6e-12 | <0.001 | <a href="#">0045449</a> : regulation of transcription                                                           |
| 19 | 57  | 315  | 0.511 | 8.9e-12 | <0.001 | <a href="#">0019219</a> : regulation of nucleobase, nucleoside, nucleotide and nucleic acid metabolism          |
| 20 | 13  | 20   | 1.392 | 3.9e-11 | <0.001 | <a href="#">0016455</a> : RNA polymerase II transcription mediator activity                                     |
| 21 | 38  | 172  | 0.609 | 8.8e-11 | <0.001 | <a href="#">0006357</a> : regulation of transcription from Pol II promoter                                      |
| 22 | 228 | 2378 | 0.263 | 4.7e-10 | <0.001 | <a href="#">0009987</a> : cellular process                                                                      |
| 23 | 18  | 47   | 0.937 | 7.7e-10 | <0.001 | <a href="#">0000082</a> : G1/S transition of mitotic cell cycle                                                 |
| 24 | 222 | 2312 | 0.259 | 9.4e-10 | <0.001 | <a href="#">0050875</a> : cellular physiological process                                                        |
| 25 | 13  | 24   | 1.206 | 9.7e-10 | <0.001 | <a href="#">0000119</a> : mediator complex/TRAP complex                                                         |
| 26 | 15  | 36   | 0.995 | 5.2e-09 | <0.001 | <a href="#">0016563</a> : transcriptional activator activity/transcription activating factor                    |
| 27 | 209 | 2201 | 0.241 | 1.6e-08 | <0.001 | <a href="#">0008151</a> : cell growth and/or maintenance/cell physiology                                        |
| 28 | 16  | 44   | 0.900 | 1.7e-08 | <0.001 | <a href="#">0006367</a> : transcription initiation from Pol II promoter                                         |
| 29 | 44  | 258  | 0.470 | 1.7e-08 | <0.001 | <a href="#">0000279</a> : M phase/M-phase                                                                       |
| 30 | 27  | 124  | 0.594 | 7.1e-08 | <0.001 | <a href="#">0000074</a> : regulation of cell cycle/cell cycle control                                           |
| 31 | 17  | 55   | 0.796 | 9.5e-08 | <0.001 | <a href="#">0003700</a> : transcription factor activity                                                         |
| 32 | 40  | 239  | 0.457 | 1.3e-07 | <0.001 | <a href="#">0000280</a> : nuclear division                                                                      |
| 33 | 15  | 45   | 0.843 | 1.8e-07 | <0.001 | <a href="#">0045944</a> : positive regulation of transcription from Pol II promoter                             |
| 34 | 17  | 59   | 0.752 | 3e-07   | <0.001 | <a href="#">0009893</a> : positive regulation of metabolism                                                     |
| 35 | 12  | 30   | 0.964 | 3.2e-07 | <0.001 | <a href="#">0004722</a> : protein serine/threonine phosphatase activity                                         |
| 36 | 16  | 53   | 0.781 | 3.3e-07 | <0.001 | <a href="#">0045893</a> : positive regulation of transcription, DNA-dependent                                   |
| 37 | 15  | 48   | 0.802 | 4.6e-07 | <0.001 | <a href="#">0004721</a> : phosphoprotein phosphatase activity/protein phosphatase activity                      |
| 38 | 9   | 17   | 1.181 | 5.4e-07 | <0.001 | <a href="#">0000124</a> : SAGA complex/Spt-Ada-Gcn5-acetyltransferase complex                                   |
| 39 | 16  | 55   | 0.758 | 5.7e-07 | <0.001 | <a href="#">0006352</a> : transcription initiation                                                              |
| 40 | 24  | 114  | 0.574 | 7.4e-07 | <0.001 | <a href="#">0005667</a> : transcription factor complex                                                          |
| 41 | 14  | 44   | 0.813 | 8.8e-07 | <0.001 | <a href="#">0003704</a> : specific RNA polymerase II transcription factor activity                              |
| 42 | 16  | 57   | 0.736 | 9.8e-07 | <0.001 | <a href="#">0045935</a> : positive regulation of nucleobase, nucleoside, nucleotide and nucleic acid metabolism |
| 43 | 16  | 57   | 0.736 | 9.8e-07 | <0.001 | <a href="#">0045941</a> : positive regulation of transcription                                                  |

|    |    |     |       |         |        |                                                                                                             |
|----|----|-----|-------|---------|--------|-------------------------------------------------------------------------------------------------------------|
| 44 | 23 | 108 | 0.580 | 1e-06   | <0.001 | <a href="#">0006468</a> : protein amino acid phosphorylation                                                |
| 45 | 8  | 14  | 1.248 | 1.1e-06 | <0.001 | <a href="#">0000114</a> : G1-specific transcription in mitotic cell cycle                                   |
| 46 | 54 | 398 | 0.353 | 1.1e-06 | <0.001 | <a href="#">0006464</a> : protein modification                                                              |
| 47 | 31 | 181 | 0.465 | 2.2e-06 | 0.001  | <a href="#">0006793</a> : phosphorus metabolism                                                             |
| 48 | 31 | 181 | 0.465 | 2.2e-06 | 0.001  | <a href="#">0006796</a> : phosphate metabolism                                                              |
| 49 | 24 | 128 | 0.510 | 6.4e-06 | 0.007  | <a href="#">0007126</a> : meiosis                                                                           |
| 50 | 11 | 33  | 0.842 | 8.1e-06 | 0.007  | <a href="#">0000086</a> : G2/M transition of mitotic cell cycle                                             |
| 51 | 12 | 42  | 0.746 | 1.9e-05 | 0.011  | <a href="#">0000075</a> : cell cycle checkpoint                                                             |
| 52 | 7  | 15  | 1.076 | 3e-05   | 0.023  | <a href="#">0000079</a> : regulation of cyclin dependent protein kinase activity/regulation of CDK activity |
| 53 | 8  | 21  | 0.930 | 4.8e-05 | 0.031  | <a href="#">0000080</a> : G1 phase of mitotic cell cycle                                                    |
| 54 | 25 | 153 | 0.437 | 4.9e-05 | 0.031  | <a href="#">0030234</a> : enzyme regulator activity/enzyme modulator                                        |
| 55 | 15 | 68  | 0.597 | 5.1e-05 | 0.032  | <a href="#">0007059</a> : chromosome segregation                                                            |
| 56 | 24 | 145 | 0.444 | 5.6e-05 | 0.034  | <a href="#">0016310</a> : phosphorylation                                                                   |
| 57 | 30 | 202 | 0.389 | 5.7e-05 | 0.035  | <a href="#">0003677</a> : DNA binding                                                                       |
| 58 | 12 | 47  | 0.680 | 6.4e-05 | 0.037  | <a href="#">0000123</a> : histone acetyltransferase complex                                                 |

## Supplementary Table 4A

### Proteins co-occurring in protein complexes with nuclear activators

Proteins significantly overrepresented in protein complexes with nuclear Y2H activators (N=181) are shown. The list is sorted by the percentage [%] of nuclear Y2H activators found to be in at least one protein complex with the respective ORF. For example, the large subunit of RNA polymerase II, YDL140C, was found in a complex with 17.7% of all nuclear Y2H activators. The percent [%] ratio is the previous percentage divided by the percentage of nuclear non-activators (in other words: the [%] ratio is the enrichment compared to nuclear non-activators). A significant co-occurrence was assessed using Fisher's exact test comparing the set of nuclear Y2H activators with nuclear non-activators (P). The P value was adjusted ( $P_{adj}$ ) for multiple testing using Holm's procedure [37]. Only the top 20 significance list ranked by percentage is shown.

| ORF     | %    | % ratio | Definition                                                         | Description                                                                                                                                                                                                                                      | P        | $P_{adj}$ |
|---------|------|---------|--------------------------------------------------------------------|--------------------------------------------------------------------------------------------------------------------------------------------------------------------------------------------------------------------------------------------------|----------|-----------|
| YDL140C | 17,7 | 3,8     | RNA polymerase II core subunit                                     | RNA polymerase II large subunit                                                                                                                                                                                                                  | 4,95E-09 | 1,02E-05  |
| YOL086C | 17,7 | 2,9     | alcohol dehydrogenase                                              | Adh protein catalyzes activities for the production of certain carboxylate esters.                                                                                                                                                               | 1,29E-06 | 2,63E-03  |
| YGL112C | 16,0 | 4,5     | TATA-binding protein-associated-factor                             | Subunit (60 kDa) of TFIID and SAGA complexes, involved in transcription initiation of RNA polymerase II and in chromatin modification, similar to histone H4                                                                                     | 1,53E-09 | 3,17E-06  |
| YBR081C | 15,5 | 4,7     | histone acetyltransferase SAGA complex member transcription factor | Subunit of the SAGA transcriptional regulatory complex, involved in proper assembly of the complex; also present as a C-terminally truncated form in the SLIK/SALSA transcriptional regulatory complex                                           | 1,75E-09 | 3,61E-06  |
| YML007W | 14,4 | 8,0     | jun-like transcription factor                                      | bZip transcription factor required for oxidative stress tolerance and localized to the nucleus in response to the presence of oxidants.                                                                                                          | 2,52E-12 | 5,22E-09  |
| YGR252W | 14,4 | 6,5     | histone acetyltransferase                                          | functions in the Ada and SAGA (Spt/Ada) complexes to acetylate nucleosomal histones                                                                                                                                                              | 4,63E-11 | 9,60E-08  |
| YDR448W | 13,8 | 6,1     | transcription factor                                               | transcription factor, member of ADA and SAGA, two transcriptional adaptor/HAT (histone acetyltransferase) complexes                                                                                                                              | 3,36E-10 | 6,95E-07  |
| YNL236W | 13,8 | 5,7     | RNA polymerase II holoenzyme/mediator subunit                      | involved in positive and negative regulation of transcription, possibly via changes in chromatin structure; regulation of YGP1 expression                                                                                                        | 8,88E-10 | 1,84E-06  |
| YOR174W | 13,8 | 3,4     | RNA polymerase II holoenzyme/mediator subunit                      | Member of RNA Polymerase II transcriptional regulation mediator                                                                                                                                                                                  | 1,72E-06 | 3,51E-03  |
| YHR174W | 10,5 | 3,9     | enolase                                                            | Enolase II, catalyzes the first common step of glycolysis and gluconeogenesis; expression is induced in response to glucose                                                                                                                      | 6,61E-06 | 1,35E-02  |
| YHR147C | 9,4  | 8,0     |                                                                    | Mitochondrial ribosomal protein of the large subunit                                                                                                                                                                                             | 2,11E-08 | 4,36E-05  |
| YNL025C | 9,4  | 4,0     | C-type cyclin associates with the Ssn3p cyclin-dependent kinase    | Component of RNA polymerase II holoenzyme, involved in RNA pol II carboxy-terminal domain phosphorylation. Activity of the kinase (SSN3)/cyclin (SSN8) pair required, along with SSN6 & TUP1, for transcriptional repression of a-specific genes | 1,84E-05 | 3,73E-02  |
| YBR198C | 8,8  | 4,3     |                                                                    | Subunit (90 kDa) of TFIID and SAGA complexes, involved in RNA polymerase II transcription initiation and in chromatin modification                                                                                                               | 1,53E-05 | 3,12E-02  |
| YKL060C | 8,8  | 4,3     | aldolase                                                           | Fructose 1,6-bisphosphate adolase, required for glycolysis and gluconeogenesis                                                                                                                                                                   | 1,53E-05 | 3,12E-02  |

|         |     |     |                                                         |                                                                                                                                                                                                                                                  |          |          |
|---------|-----|-----|---------------------------------------------------------|--------------------------------------------------------------------------------------------------------------------------------------------------------------------------------------------------------------------------------------------------|----------|----------|
| YGL025C | 8,3 | 9,6 |                                                         | Probable transcription factor, polyglutamine domain protein                                                                                                                                                                                      | 3,43E-08 | 7,09E-05 |
| YBR253W | 8,3 | 9,6 | part of Srb/Mediator complex transcription factor       | involved in transcription as part of Srb/Mediator complex                                                                                                                                                                                        | 3,43E-08 | 7,09E-05 |
| YHR058C | 8,3 | 9,6 |                                                         | RNA polymerase II transcriptional regulation mediator                                                                                                                                                                                            | 3,43E-08 | 7,09E-05 |
| YER022W | 8,3 | 9,6 | RNA polymerase II holoenzyme/mediator subunit           | subunit of RNA polymerase II holoenzyme/mediator complex                                                                                                                                                                                         | 3,43E-08 | 7,09E-05 |
| YPL042C | 8,3 | 8,8 | cyclin (SSN8)-dependent serine/threonine protein kinase | Component of RNA polymerase II holoenzyme, involved in RNA pol II carboxy-terminal domain phosphorylation. Activity of the kinase (SSN3)/cyclin (SSN8) pair required, along with SSN6 & TUP1, for transcriptional repression of a-specific genes | 6,89E-08 | 1,42E-04 |
| YCR081W | 8,3 | 8,8 |                                                         | activation mediator subcomplex of RNA polymerase I holoenzyme                                                                                                                                                                                    | 6,89E-08 | 1,42E-04 |



## Supplementary Table 4B

### Binary interactions of Y2H activators

Proteins interacting with nuclear Y2H activators (N=181). Only the twenty highest significant proteins are shown. The list is sorted by the percentage [%] of nuclear Y2H activators found to interact with the respective ORF. For example, 5.5% of all nuclear Y2H activators interact with YDR167W, a subunit of TFIID and SAGA. The percent [%] ratio compares this percentage with the percentage for nuclear non activators (NA – the % ratio could not be calculated because no interaction with non activator set was found). A significant interaction was assessed using Fisher's exact test comparing the set of nuclear Y2H activators with nuclear non activators (P). When the P value was adjusted ( $P_{adj}$ ) for multiple testing using Holm's procedure [37], none of these interaction were significant, most likely due to a limited interaction data set.

| ORF     | %   | % ratio | Definition                                                                     | Description                                                                                                                                                                                                                     | p        |
|---------|-----|---------|--------------------------------------------------------------------------------|---------------------------------------------------------------------------------------------------------------------------------------------------------------------------------------------------------------------------------|----------|
| YDR167W | 5,5 | 4,7     | TFIID subunit                                                                  | Subunit (145 kDa) of TFIID and SAGA complexes, involved in RNA polymerase II transcription initiation and in chromatin modification                                                                                             | 4,24E-04 |
| YLR055C | 3,9 | 9,9     | probable member of histone acetyltransferase SAGA complex transcription factor | Subunit of the SAGA transcriptional regulatory complex but not present in SAGA-like complex SLIK/SALSA, required for SAGA-mediated inhibition at some promoters                                                                 | 1,89E-04 |
| YBR081C | 3,9 | 9,9     | histone acetyltransferase SAGA complex member transcription factor             | Subunit of the SAGA transcriptional regulatory complex, involved in proper assembly of the complex; also present as a C-terminally truncated form in the SLIK/SALSA transcriptional regulatory complex                          | 1,89E-04 |
| YGR252W | 3,9 | 9,9     | histone acetyltransferase                                                      | functions in the Ada and SAGA (Spt/Ada) complexes to acetylate nucleosomal histones                                                                                                                                             | 1,89E-04 |
| YGL112C | 3,9 | 8,2     | TATA-binding protein-associated-factor                                         | Subunit (60 kDa) of TFIID and SAGA complexes, involved in transcription initiation of RNA polymerase II and in chromatin modification, similar to histone H4                                                                    | 3,67E-04 |
| YBR198C | 3,9 | 8,2     |                                                                                | Subunit (90 kDa) of TFIID and SAGA complexes, involved in RNA polymerase II transcription initiation and in chromatin modification                                                                                              | 3,67E-04 |
| YHR099W | 3,9 | 6,2     | ATM/Mec1/TOR1/TOR2-related NuA4 complex component                              | TRA1 is the homolog of the human protein TRRAP which we have isolated as an essential cofactor of c-Myc.                                                                                                                        | 1,11E-03 |
| YDR176W | 3,9 | 5,5     |                                                                                | Involved in glucose repression of GAL4p-regulated transcription                                                                                                                                                                 | 1,76E-03 |
| YOR174W | 3,3 | 14,1    | RNA polymerase II holoenzyme/mediator subunit                                  | Member of RNA Polymerase II transcriptional regulation mediator                                                                                                                                                                 | 2,09E-04 |
| YDR145W | 3,3 | 7,0     | TFIID subunit                                                                  | Subunit (61/68 kDa) of TFIID and SAGA complexes, involved in RNA polymerase II transcription initiation and in chromatin modification, similar to histone H2A                                                                   | 1,66E-03 |
| YPL254W | 3,3 | 7,0     | Ada/Gcn5 protein complex member transcription factor                           | Adaptor protein required for structural integrity of the SAGA complex, a histone acetyltransferase-coactivator complex that is involved in global regulation of gene expression through acetylation and transcription functions | 1,66E-03 |
| YMR236W | 3,3 | 7,0     | TFIID subunit                                                                  | Subunit (17 kDa) of TFIID and SAGA complexes, involved in RNA polymerase II transcription initiation and in chromatin modification, similar to histone H3                                                                       | 1,66E-03 |
| YDR392W | 3,3 | 6,0     | histone acetyltransferase SAGA complex member transcription factor             | Subunit of the SAGA and SAGA-like transcriptional regulatory complexes,                                                                                                                                                         | 2,76E-03 |

|         |     |      |                                               |                                                                                                                                                                                                                                           |          |
|---------|-----|------|-----------------------------------------------|-------------------------------------------------------------------------------------------------------------------------------------------------------------------------------------------------------------------------------------------|----------|
|         |     |      |                                               | interacts with Spt15p to activate transcription of some RNA polymerase II-dependent genes, also functions to inhibit transcription at some promoters                                                                                      |          |
| YOL135C | 2,8 | 17,6 | RNA polymerase II holoenzyme/mediator subunit | Member of RNA Polymerase II transcriptional regulation mediator                                                                                                                                                                           | 4,81E-04 |
| YPR040W | 2,2 | NA   |                                               | SDF1 the first observed null phenotype was Sporulation DeFiciency                                                                                                                                                                         | 2,33E-04 |
| YGL025C | 2,2 | 28,2 |                                               | Probable transcription factor, polyglutamine domain protein                                                                                                                                                                               | 1,05E-03 |
| YBR270C | 2,2 | 28,2 |                                               |                                                                                                                                                                                                                                           | 1,05E-03 |
| YDL132W | 2,2 | 14,1 |                                               | Cullin, structural protein of SCF complexes (which also contain Skp1p, Cdc34p, and an F-box protein) involved in ubiquitination; SCF promotes the G1-S transition by targeting G1 cyclins and the Cln-CDK inhibitor Sic1p for degradation | 2,84E-03 |
| YIL021W | 2,2 | 14,1 | RNA polymerase II 45 kDa subunit              | RNA polymerase II core subunit                                                                                                                                                                                                            | 2,84E-03 |
| YDR054C | 2,2 | 14,1 | ubiquitin-conjugating enzyme                  | Ubiquitin-conjugating enzyme or E2; together with Skp1p, Rbx1p, Cdc53p, and an F-box protein, forms a ubiquitin-protein ligase called the SCF complex which regulates cell cycle progression by targeting key substrates for degradation  | 2,84E-03 |
| YDR308C | 1,7 | NA   | RNA polymerase II holoenzyme/mediator subunit | Suppressor of RNA polymerase II, possible component of the holoenzyme                                                                                                                                                                     | 1,90E-03 |

## Supplementary Table 5

**Domains of Y2H activators.** Domains over-represented in the Y2H activator set ranked by their significance are shown. The number of Y2H activators containing the domain (#) and enrichment of this domain in the set of Y2H activators compared to the whole genome are shown. The significance level indicates significant over-representation using Fisher's exact test only ( $P < 0.05$ , \*) or also after correction for multiple testing using Holm's procedure ( $P < 0.05$ , \*\*).

| Domain   | Description                                                                                      | #  | enrichment | significance level |
|----------|--------------------------------------------------------------------------------------------------|----|------------|--------------------|
| HLH      | helix loop helix domain                                                                          | 6  | 6,64       | **                 |
| ZnF_C2C2 | C2C2 Zinc finger                                                                                 | 4  | 8,85       | **                 |
| GAL4     | GAL4-like Zn(II) <sub>2</sub> Cys <sub>6</sub> (or C6 zinc) binuclear cluster DNA-binding domain | 16 | 2,53       | *                  |
| RPOL9    | RNA polymerase subunit 9                                                                         | 3  | 8,85       | *                  |
| ZnF_C2H2 | zinc finger                                                                                      | 13 | 2,30       | *                  |
| ZnF_C2HC | zinc finger                                                                                      | 5  | 4,02       | *                  |
| IBR      | In Between Ring fingers                                                                          | 2  | 8,85       | *                  |
| BRLZ     | basic region leucine zipper                                                                      | 5  | 2,95       | *                  |
| ArfGap   | Putative GTP-ase activating proteins for the small GTPase, ARF                                   | 3  | 4,43       | *                  |
| PP2C_SIG | Sigma factor PP2C-like phosphatases                                                              | 3  | 4,43       | *                  |
| STYKc    | Protein kinase; unclassified specificity.                                                        | 10 | 2,06       | *                  |
| CNH      | Domain found in NIK1-like kinases, mouse citron and yeast ROM1, ROM2                             | 2  | 5,90       | *                  |
| Cu_FIST  | Copper-Fist                                                                                      | 2  | 5,90       | *                  |
| S_TK_X   | Extension to Ser/Thr-type protein kinases                                                        | 4  | 2,95       | *                  |
| PP2Ac    | Protein phosphatase 2A homologues, catalytic domain.                                             | 4  | 2,95       | *                  |
